# Supplementary material for: Light-sensitive Ca2+ signaling in the mammalian choroid
Source: PubMed Central journal article supplement (PMC11573543; doi:10.1073/pnas.2418429121), 2024-11-08
Supplement: pnas.2418429121.sapp.pdf [file pnas.2418429121.sapp.pdf]

1 **Supplement Information for**

2 Light Sensitive Ca<sup>2+</sup> Signaling in the Mammalian Choroid.

3

4 Ahmed M. Eltanahy<sup>1</sup>, Alex Aupetit<sup>1</sup>, Ethan D. Buhr<sup>2,5</sup>, Russell N. Van Gelder<sup>2,3,4,5</sup>, and Albert L.  
5 Gonzales<sup>1</sup>

6 <sup>1</sup>Department of Physiology and Cell Biology, University of Nevada School of Medicine, Reno, NV,  
7 89557-0318, USA

8 <sup>2</sup>Departments of <sup>2</sup>Ophthalmology, <sup>3</sup>Laboratory Medicine and Pathology, and <sup>4</sup>Biological Structure,  
9 and <sup>5</sup>Roger and Angie Karalis Retina Center, University of Washington, Seattle, WA, 98104, USA

10

11 **Corresponding Author:** Albert L. Gonzales

12 **Email:** [albertgonzales@unr.edu](mailto:albertgonzales@unr.edu)

13

14

15

16

17

## 18 **Methods**

### 19 *Animal models*

20 All animal studies were performed in accordance with guidelines of the Institutional Animal  
21 Care and Use Committee (IACUC approval no. 20-07-1039-1) of the University of Nevada, Reno;  
22 University of Washington, School of Medicine, Seattle; and University of Cincinnati, College of  
23 Medicine. Adult (2–5-month-old) male and female mice were group-housed on a 12-hour  
24 light:dark cycle with environmental enrichment and free access to food and water. Animals were  
25 euthanized by 4% isoflurane anesthesia followed by rapid decapitation. All experimental protocols  
26 used in this study are in accord with institutional guidelines approved by the Institutional Animal  
27 Care and Use Committee of the University of Nevada Reno. The following mice strains were used:  
28 C57BL/6J (stock no. 000604; Jackson Laboratories); NG2-DSRed (stock no. 008241); the  
29 previously described *Cdh5*-GCaMP6f transgenic mouse line (40), in which the high signal-to-  
30 noise  $Ca^{2+}$  indicator GCaMP6f is expressed under the transcriptional control of the *Cdh5*  
31 promoter; and NG2-GCaMP6f mice, generated by crossing NG2<sup>Cre</sup> mice (008533; Jackson  
32 Laboratory, Bar Harbor, ME) with floxed GCaMP6 mice (024106; Jackson Laboratory). Eyes from  
33 *Opn3*-eGFP, *Opn4*-Ai14, and *Opn5*-Ai14 reporter mice were received from the University of  
34 Washington, School of Medicine, Seattle, and the University of Cincinnati, School of Medicine.  
35 The *Opn3*-eGFP reporter mouse is a genetically modified *Opn3*-eGFP (enhanced green  
36 fluorescent protein) reporter mouse strain that harbors an eGFP reporter gene inserted at the  
37 start of exon 1 of the coding sequence of *Opn3*. Because this is positioned downstream of the  
38 *Opn3* promoter, eGFP expression is driven by the *Opn3* promoter. To assess the expression of  
39 *Opn4* and *Opn5* in different choroidal cell types, we used *Opn4*<sup>cre/+</sup>;Ai14 (R26-LSL-tdTomato)  
40 and *Opn5*<sup>cre/+</sup>;Ai14 (R26-LSL-tdTomato) mice, in which tdTomato is expressed in the *Opn4* or  
41 *Opn5* lineage, respectively. *NG2DsRedBAC* reporter mice [*Tg(Cspg4-DsRed.T1)1Akik/J*]  
42 express the red fluorescent protein *DsRed.T1* under the control of the mouse *Cspg4* (chondroitin  
43 sulfate proteoglycan 4) promoter, which drives expression of the mural cell marker, NG2  
44 (neural/glial antigen 2).

45 *Cynomolgus monkeys* were housed and maintained at Charles River Laboratories,  
46 Preclinical Services (Reno, NV, USA). The Institutional Animal Care and Use Committee (IACUC  
47 approval no. I-000536, Charles River Laboratories). *Cynomolgus monkeys* of either sex (2–8  
48 years of age) were sedated with ketamine HCL (10 mg kg<sup>-1</sup> given intramuscularly; Zoetis,  
49 Parsippany, NJ, USA) and euthanized using pentobarbital (I.V., Fatal-Plus; Vortech  
50 Pharmaceuticals, Ltd, Dearborn, MI, USA) and exsanguination. The dosage for pentobarbital was  
51 0–4.5 kg, 1.0 ml; 4.6–9.1 kg, 2.0 ml and >9.2 kg, 3.0 ml. Tissue samples from these animals were  
52 provided immediately after necropsy to the laboratories within the Department of Physiology and  
53 Cell Biology at the University of Nevada, Reno. Freshly isolated monkey eyes were dissected  
54 immediately at the facilities of the University of Nevada, Reno, and used for *ex vivo* experiments  
55 and imaging. All non-human primate tissues used in the present study came from animals that  
56 had been used previously for pharmaceutical testing, and no non-human primates were  
57 purchased, bred, or killed specifically for the current study.

58

### 59 *Solutions and reagents*

60 Retina dissection buffer consists of 119 mM NaCl, 3 mM KCl, 0 mM CaCl<sub>2</sub>, 3 mM MgCl<sub>2</sub>,  
61 5 mM glucose, 26.2 mM NaHCO<sub>3</sub> and 1 mM NaH<sub>2</sub>PO<sub>4</sub>, bubbled with 95% O<sub>2</sub>/5% CO<sub>2</sub> (pH 7.4).  
62 Retinal physiological saline solution (PSS; pH 7.4) contains 124 mM NaCl, 26 mM NaHCO<sub>3</sub>, 1  
63 mM NaH<sub>2</sub>PO<sub>4</sub>, 2.5 mM KCl, 1.8 mM CaCl<sub>2</sub>, 2 mM MgCl<sub>2</sub> and 10 mM glucose, bubbled with 95%  
64 O<sub>2</sub>/5% CO<sub>2</sub> (31, 41).  $Ca^{2+}$ -free and  $Mg^{2+}$ -supplemented PSS contains 124 mM NaCl, 26 mM

65 NaHCO<sub>3</sub>, 1 mM NaH<sub>2</sub>PO<sub>4</sub>, 2.5 mM KCl, 3.8 mM MgCl<sub>2</sub> and 10 mM glucose, supplemented with 6  
66 μM cis-retinal. All chemicals and drugs were purchased from Cayman Chemical (USA) and  
67 Sigma-Aldrich (St. Louis, MO, USA) unless specified otherwise.

### 68 *Immunohistochemistry*

69 Following euthanasia, eyes were enucleated and placed in 4% paraformaldehyde, diluted  
70 in phosphate-buffered saline (PBS), for 2 hours at 4°C. Whole retinas were dissected from eyes,  
71 blocked, and permeabilized by incubating with PBS containing 5% bovine serum albumin (BSA)  
72 and 0.2% Triton X-100 at room temperature for 2 hours. Choroids were then incubated for 24  
73 hours at 4°C with primary antibody, diluted in PBS containing 0.5% BSA and 0.2% Triton X-100.  
74 The following conjugated antibodies/stains were used at the indicated dilutions: anti-NG2 antibody  
75 1:1000 (ab129051). Choroids were washed three times in PBS for 10 minutes each at room  
76 temperature, after which radial slits were made to create a flat-mount preparation, which was then  
77 placed under coverslips and stabilized using Vectashield Plus mounting media (Vector  
78 Laboratories). Images were acquired with an upright 10X air (0.1 NA) or 20–60X water-immersion  
79 objective utilizing widefield microscopy.

### 80 *Pressurized and non-pressurized ex vivo choroid preparation*

81 The *ex vivo* whole-eye model, developed by our group, was prepared as previously  
82 described (31). Briefly, after euthanizing mice, the overlying skull and brain were carefully  
83 removed, after which the eye, surrounding orbit bones, connected musculature, vasculature, and  
84 optic nerve were removed in one piece using angled eye scissors and placed in 4°C Ca<sup>2+</sup>-free  
85 retina dissection buffer. The surrounding bones and outer muscles were removed into a dissection  
86 dish at 4°C with intermittent exchange of bubbled dissection solution. The inner muscles and  
87 connective tissue were then removed, revealing the ophthalmic artery, which enters the retina at  
88 the base of the optic nerve. The cornea was pierced using fine forceps, and the entire cornea and  
89 iris were removed by making a circumferential cut. The lens was grasped with fine forceps, after  
90 which the connective tissue of the ora serrata was disrupted and the lens was removed using  
91 closed, semi-fine, blunt forceps. Fine dissection scissors were used to remove the retina, leaving  
92 the RPE-choroid-sclera complex intact. For the non-pressurized choroid preparation, the RPE-  
93 choroid-sclera complex was flat-mounted and imaged using a confocal microscope while  
94 superfusing the tissue with retina physiological saline solution. The RPE layer can be removed  
95 by gently flushing of bath solution buffer using a micropipette. For the pressurized preparation,  
96 the dissected choroid was first transferred to a custom myography chamber containing room  
97 temperature retina dissection buffer using a large barrel transfer pipette. The ophthalmic artery  
98 was then cannulated using a pulled borosilicate glass pipette (~100–150 μm tip diameter) filled  
99 with retina PSS, maintained at pH 7.4 by bubbling with 95% O<sub>2</sub>/5% CO<sub>2</sub> and supplemented with  
100 6 μM cis-retinal. Loose ophthalmic artery branches were tied off using a monofilament nylon fiber  
101 (cat. THR-G; Living Systems), and the cannulated vessel was secured to the pipette.

102 The tip of the cannulation pipette was advanced in such a manner that the downstream  
103 ophthalmic artery was narrower than the tip of the pipette, a maneuver that allows the remaining  
104 ophthalmic artery and retinal artery vasculature, rather than the tip of the pipette, to set inlet flow.  
105 The choroid was placed over a custom silicone platform and flattened by making radial cuts in the  
106 outer edges, after which the choroid was secured to the platform using short pins cut from a 70-  
107 μm diameter tungsten wire. The cannulation pipette was attached to a pressure transducer to  
108 allow measurement of pressure at the level of the ophthalmic artery and connected to two solution  
109 columns, linked via a 3-way adjustable valve. One column was fixed at a height providing a  
110 pressure of 25 mmHg and the other was adjustable, providing a full range of pressures from 0 to  
111 100 mmHg. This allowed for sustained pressure steps by incrementally changing the adjustable

112 column height. Successful choroid vessel cannulation was confirmed by pressurizing the choroid  
113 to 25 mmHg and monitoring the rapid elimination of blood cells from the vasculature via brightfield  
114 microscopy. Bath perfusion (with bubbled PSS) was kept constant at 5 mL/min (3 mL/min for  
115 microelectrode experiments), and a temperature of 35–36°C was maintained using an inline  
116 heater. The preparation was allowed to equilibrate for 20 minutes at 25 mmHg before the start of  
117 experimentation.

118 For the double-eye cannulation technique, we used a 35-gauge stainless steel needle  
119 connected to polyethylene tubing and a 20  $\mu$ L Hamilton syringe. The tubing was first loaded with  
120 5  $\mu$ L of Na<sup>+</sup>-fluorescein (Sigma), after which the needle was placed in the vitreous using a trans-  
121 corneal approach so as to avoid puncturing the choroid circulation, and 3  $\mu$ L of fluorescein was  
122 injected at a rate of 1  $\mu$ L/min using a syringe pump (PHD ULTRA; Harvard Apparatus). After  
123 perfusing the whole eye for 1-hour, trans-retinal fluorescein absorption was quantified at the level  
124 of the RPE and choriocapillaris endothelium by flat mounting and confocal microscopy imaging.  
125 Mean fluorescence intensity values of pixels for RPE and choroid endothelial cells were quantified  
126 using ImageJ.

### 127 *Light stimulation*

128 The choroid vasculature was photostimulated using a Mightex Polygon DMD pattern  
129 illuminator, which provides precise spatiotemporal, high-resolution control of light delivery, and a  
130 dedicated 7-wavelength (405, 445, 470, 520, 528, 555, and 640 nm) laser launch (LDI-7, 89  
131 North). For dark/light treatment experiments, the choroid vasculature was pressurized for 60  
132 minutes at different perfusion pressures (25–60 mmHg) using a Mightex photostimulation system  
133 (Polygon1000-G).

### 134 *Ca<sup>2+</sup>, NOS, Fluo4-AM and calcein-AM imaging*

135 Changes in endothelial cell and mural cell Ca<sup>2+</sup> levels were assessed by monitoring  
136 changes in cytosolic Ca<sup>2+</sup> concentration, measured as changes in GCaMP6f fluorescence  
137 intensity over time. GCaMP6f fluorescence was imaged using a stand-alone Crest Optics X-Light  
138 V3 spinning-disk confocal and widefield microscope with a dedicated, 7-wavelength (405, 445,  
139 470, 520, 528, 555, and 640 nm) laser launch (LDI-7; 89 North) and dual low-light ORCA-Fusion  
140 Gen-III sCMOS Cameras (Hamamatsu) attached to an Olympus BX51WI microscope base.  
141 GCaMP6f fluorescence was excited using a 488 nm solid-state laser, and the emitted  
142 fluorescence was collected through a 520-nm band-pass filter. Images were acquired at a rate of  
143 0.5 frames/s with an exposure time of 200 ms at 0.1% laser power, parameters that minimize  
144 cross-stimulation by imaging light. Because of the sensitivity of the CMOS cameras, these  
145 acquisition settings were sufficient to obtain fluorescent images without stimulating the tissue. The  
146 parameter,  $\Delta F/F_0$ , for an intensimetric indicator is determined as the fluorescence intensity  
147 change registered during the change in Ca<sup>2+</sup> ( $\Delta F$ ) divided by the average baseline fluorescence  
148 ( $F_0$ ) under resting conditions. NO production was measured by incubating flat-mounted choroids  
149 with 1  $\mu$ M DAF-2 for 30 minutes and then measuring the change in fluorescence of choroid  
150 endothelial cells at 37°C by confocal microscopy using excitation and emission wavelengths of  
151 488 nm and 520 nm, as previously reported (83). Monkey tissues were visualized by loading flat-  
152 mounted monkey choriocapillaris patches with either 1  $\mu$ M calcein-AM or 10  $\mu$ M Fluo-4 am. In the  
153 latter case, 50  $\mu$ g Fluo-4-AM and 1% pluronic acid-127 (Molecular Probes), dissolved in a total  
154 volume of 50  $\mu$ L DMSO, were loaded into the tissue by bath application (final Fluo-4-AM  
155 concentration, 10  $\mu$ M).

### 156 *Statistical analysis*

157 Data in figures and text are presented as means  $\pm$  standard error of the mean (SEM)  
158 unless otherwise stated. All experiments were performed in a randomized manner (animals,  
159 pharmacological treatments). Statistical tests were performed using GraphPad Prism 9 software.  
160 Statistical significance was determined using paired Student's t-tests and one-way analysis of  
161 variance (ANOVA). P-values  $\leq 0.05$  were considered statistically significant for all experiments.

162

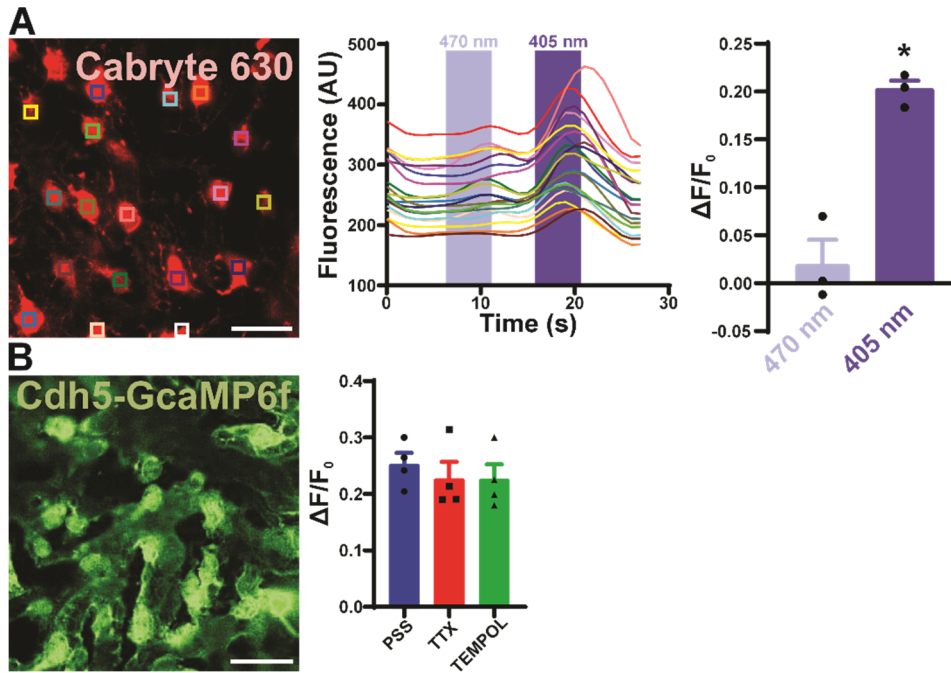

165 **Supplement Figure 1: Violet light Stimulate Vasculature  $Ca^{2+}$  Signals.** **A:** Representative  
 166 image, traces and summary data of Cabryte 630–loaded choriocapillaris following light stimulation  
 167 at 470 nm ( $6.1 \times 10^{14}$  photons/cm<sup>2</sup>/s) and 405 nm ( $6.1 \times 10^{14}$  photons/cm<sup>2</sup>/s) (n = 3 choroid  
 168 preparations) Scale bars: 30  $\mu$ m \*P < 0.05 to 470 nm **B:** Representative image and summary data  
 169 showing changes in choriocapillaris endothelial  $Ca^{2+}$  signaling using *Cdh5*-GCaMP6f transgenic  
 170 mice in response to violet light stimulation under control conditions (PSS) and following treatment  
 171 with Tetrodotoxin (TTX, 500 nM) or TEMPOL (4-hydroxy-2,2,6,6-tetramethyl-1-piperidinyloxy, 10  
 172  $\mu$ M) (n = 4 choroid preparations) Scale bars: 30  $\mu$ m.

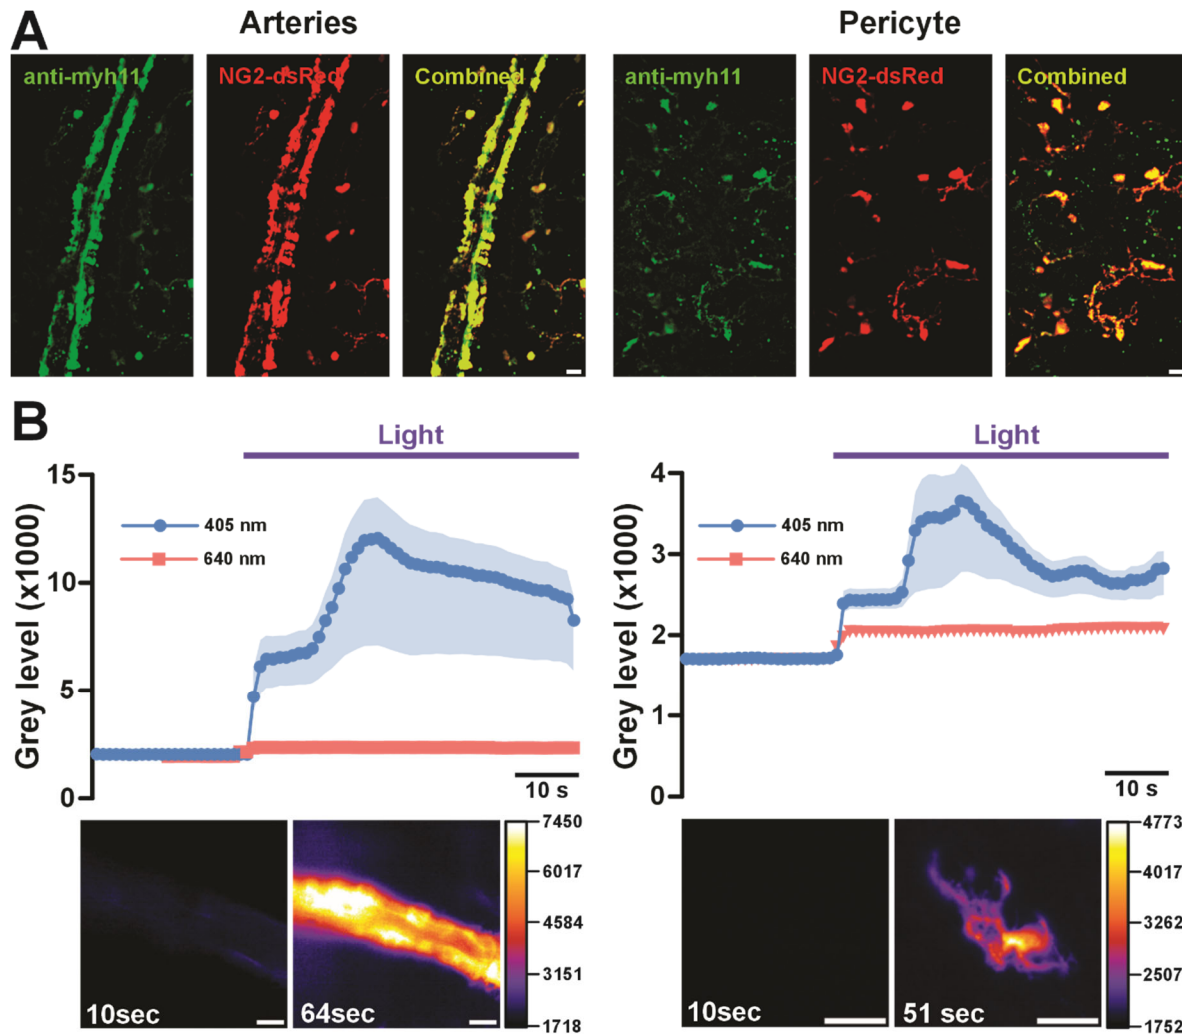

174

175 **Supplemental Figure 2: Violet light stimulates  $Ca^{2+}$  and Constriction in Choroids isolated**  
 176 **from Myh11-GCaMP6f Transgenic Mice.** **A:** Representative images showing melanopsin  
 177 expression in choroidal arterioles (left) and choroidal pericytes (right) in choroid flat mounts from  
 178 an NG2-dsRed mice (red) and immunohistochemical detection of MYH11 using an anti-myh11  
 179 polyclonal antibody (green). Scale bar = 10  $\mu$ m. **B:** Representative traces (top) and images  
 180 (bottom) of a Myh11-GCaMP6f-Ai95D mouse choroidal preparation showing changes in  
 181 fluorescence in response to light stimulation (405 and 640 nm) or arterioles (left) and pericytes  
 182 (right). Scale bar = 10  $\mu$ m

183

184

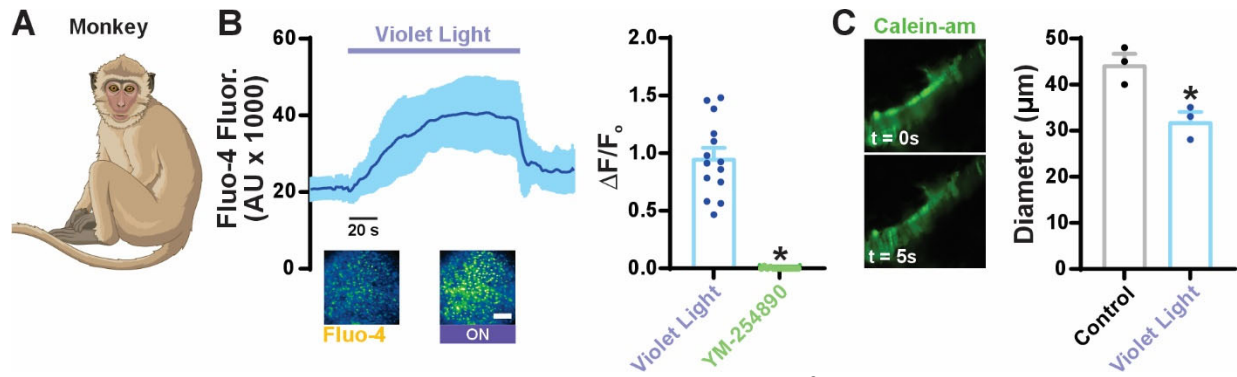

185  
 186 **Supplement Figure 3. Intrinsic Light-Sensitive  $Ca^{2+}$  Signaling in the Primate**  
 187 **Choriocapillaris Endothelium.** **A:** Schematic illustration of an *ex vivo* choroid preparation from  
 188 freshly isolated *Cynomolgus* monkey eyes. **B (top left):** Representative average fluorescence  
 189 trace from Fluo-4-AM-loaded choriocapillaris endothelium following violet light stimulation (405  
 190 nm,  $6.1 \times 10^{14}$  photons/cm<sup>2</sup>/s) (*n* = 3 choroid preparations from 3 monkeys). **B (bottom left):**  
 191 Representative micrographs of a monkey choroidal preparation showing changes in Fluo-4  
 192 fluorescence in response to violet light stimulation (405 nm). Scale bars: 50  $\mu$ m. **B (right):**  
 193 Summary data showing changes in Fluo-4 fluorescence in the choriocapillaris endothelium in  
 194 response to violet stimulation (405 nm,  $6.1 \times 10^{14}$  photons/cm<sup>2</sup>/s) under control conditions and in  
 195 the presence of YM-254890 (1  $\mu$ M). Data are presented as means  $\pm$  SEM (error bars; \**P* < 0.05  
 196 to violet light; *n* = 8 regions of interest (ROIs) in 3 choroids from 3 monkeys per group). **C**  
 197 Representative images (**left**) and arteriolar diameter in response to stimulation with violet light  
 198 (405 nm,  $6.1 \times 10^{14}$  photons/cm<sup>2</sup>/s). Data are presented as means  $\pm$  SEM (error bars; \**P* < 0.05  
 199 to control; *n* = 3 vessels in 3 choroids from 3 monkeys per group). Representative micrographs  
 200 of calcein-AM staining of the choroid vasculature before and 5 seconds after stimulation with violet  
 201 light. Scale bars = 20  $\mu$ m



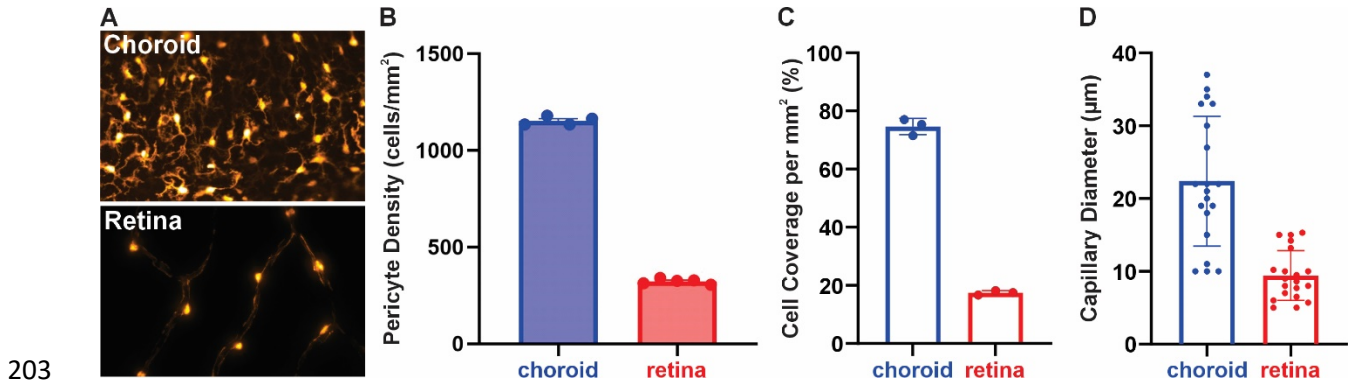

204 **Supplement Figure 4: Choroid Express Greater Number of Capillary Pericytes A:**  
 205 Representative images of the choroid and retina of NG2dsRed mice. **B:** Summary data showing  
 206 average quantification of pericyte density (cells/mm<sup>2</sup>) in the choroid and retina n=4  
 207 retinas/choroids from 4 mice. \**P* < 0.05. **C:** Percentage of cell coverage / mm<sup>2</sup> (n=3 for each group  
 208 from 3 mice, \**P* < 0.05). **D:** Summary data showing capillary diameters in the choroids and retinas  
 209 from NG2dsRed mice in μm. \**P* < 0.05.

210

211

212
